# Supplementary material
Source: PubMed Central journal article supplement (PMC4193793)
Supplement: NIHMS596666-supplement-Supplemental.pdf [file NIHMS596666-supplement-Supplemental.pdf]

Supporting Information

© Wiley-VCH 2013

69451 Weinheim, Germany

**Chemically Exfoliated MoS<sub>2</sub> as Near-Infrared Photothermal Agents\*\***

*Stanley S. Chou,\* Bryan Kaehr,\* Jaemyung Kim, Brian M. Foley, Mrinmoy De,  
Patrick E. Hopkins, Jiaying Huang, C. Jeffrey Brinker, and Vinayak P. Dravid*

anie\_201209229\_sm\_miscellaneous\_information.pdf

**As referred to in the manuscript, this document contains detailed experiment procedures and supporting data and figures.**

**ceMoS<sub>2</sub> Synthesis (reiterated):** All materials were obtained from Sigma Aldrich, unless otherwise indicated. Procedures for were adapted from Joensen, et al.<sup>[1]</sup> In a nitrogen environment, 300 mg of MoS<sub>2</sub> powder was immersed in 3 ml of n-butyllithium (1.6 M in hexane). Solution was stirred for 48 hr at room temperature. Mixture was then filtered over Whatman #41 filter and rinsed with 100 ml of hexane. Mixture was collected and then removed from the nitrogen environment. To the semi-dry mixture, 300 ml of di-H<sub>2</sub>O (18.2 MΩ•cm at 25 °C) was added. Mixture was sonicated for 1 hr to achieve exfoliation. The MoS<sub>2</sub> nanosheets were then centrifuged and washed with di-H<sub>2</sub>O 3 times. It was then collected and dialyzed against di-H<sub>2</sub>O for 5 days. Concentration was determined by ICP-MS.

**Atomic Force Microscopy.** AFM samples were prepared by either drop casting or dip coating MoS<sub>2</sub> solution, diluted to the point of no visible color, on to a silicon chip with 300 nm SiO<sub>2</sub>. Samples were placed in vacuum chamber and allowed to dry for 2 hours. Images were acquired using a Park XE-100 AFM operating in tapping mode with a silicon nitride cantilever.

**Inductively coupled plasma mass spectrometry (ICP-MS):** ICP-MS specimens were prepared by adding fixed aliquots (2.5 to 50 μl) of ceMoS<sub>2</sub> solution to 100μl of 1:1 HCL:HNO<sub>3</sub> (trace grade). Mixture was then placed in 75 °C water bath for digestion (6 hours). 25 μl of ICP-MS internal standard solution was then added, and solution was diluted to 5 ml using di-H<sub>2</sub>O. External standards were prepared accordingly using Mo standard solution from Sigma Aldrich. Each external standard is made with varying quantities of Mo standard, 100 μl of 1:1 HC:HNO<sub>3</sub> (trace grade) and 25 μl of internal standard. Each external standard solution was then diluted to 5 ml, as with the case of specimens. Accuracy of external standard preparation was checked by linear regression of ICP-MS signal ( $R^2 > 99.999$ ). Mo concentration of undiluted specimen was then determined by using dilution factor described above. Mass of MoS<sub>2</sub> in solution was estimated by taking formula weight ratios of MoS<sub>2</sub> versus Mo.

**NIR laser heating of MoS<sub>2</sub> in water:** The output of a titanium:sapphire laser (Tsunami, Spectra Physics) centered at 800 nm and operating in continuous wave mode was directed into a 7 mm diameter circular well containing 100 μl of solution. The ~ 3 mm beam spot was centered in the well and measured 0.8-0.82 W at the sample. A thermocouple was positioned in the solution at the edge of the well to avoid interaction with the laser. All solutions were equilibrated to room temperature prior to laser heating.

**X-Ray Photoelectron Spectroscopy (XPS).** XPS samples were prepared by drop casting MoS<sub>2</sub> solution on to a silicon chip with 300 nm SiO<sub>2</sub>. Samples were placed in vacuum chamber and allowed to dry overnight. Spectra were acquired using a Thermo Scientific ESCALAB 250 Xi.

**Time-Domain Thermotransmission (TDTT) measurements:** TDTT was used to measure the thermal boundary conductance from the ceMoS<sub>2</sub> nanosheets into the water. In short, TDTT is a pump-probe technique in which the change in transmission of a probe beam is monitored as a function of time delay of the pump-beam, which acts as a modulated heating event. Our TDTT system is centered around

pulsed laser heating from a Ti:Sapphire oscillator with a fundamental output of 90 fs pulses at 80 MHz (12.5 ns between laser pulses) and 800 nm. The output of the laser system is split into two paths – a “pump” path and a time delayed “probe” path. The pump pulses are then modulated at with an electro-optic modulator to create a modulated heating of 11.39 MHz in the ceMoS<sub>2</sub> sheets. Before focusing the pump-pulses down into the MoS<sub>2</sub> suspension, the pulses are passed through a BiBO crystal to frequency double the heating event to 400 nm. Then, these 400 nm pump pulses are passed through a 5X objective to creating the modulated heating event in the ceMoS<sub>2</sub> from a Gaussian pump spot with a 1/e<sup>2</sup> radii of 25 μm. The pump pulse are time delayed via a mechanical delay stage and focused collinearly via the same 5X objective to probe the middle of the pump heating event with a 1/e<sup>2</sup> radii of 6 μm. The transmitted probe beam through the ceMoS<sub>2</sub>/water suspension is focused into a photodiode, the output voltage of which is filtered by a lock in amplifier to monitor the change in voltage (transmission) at the modulation frequency of the pump pulses as a function of pump-probe delay time. This transient transmission, which is directly related to the transient absorption, is related to the temperature change from the MoS<sub>2</sub> to the water over ~1 ns of delay time. As the ceMoS<sub>2</sub> sheets are essentially monolayers, the heat transfer can be assumed as purely one dimensional from the planar, absorbing surface of the nanosheets. We therefore model the heat transfer with a one-dimensional thermal model described elsewhere;<sup>[2]</sup> this particular model is based on the solution to the one-dimensional heat equation in the frequency domain for a two layer system: an instantaneously thermalized ceMoS<sub>2</sub> sheet and a semi-infinite water heat sink (this semi-infinite assumption is valid due to the modulation frequency of the pump pulses and pump-probe time delay in the experiments<sup>[3]</sup>). The temperature of the absorbing MoS<sub>2</sub> nanosheets are then related to the output of the lock-in amplifier through the lock-in transfer function. For these data, we monitor in-phase voltage of the lock-in amplifier, which is related to the temperature change via<sup>[4]</sup>

$$V_{in}(f_{pump}) = A \sum_{M=-\infty}^{\infty} \left( \theta(f_{pump} + Mf) + \theta(f_{pump} - Mf) \right) \exp[iMf\tau], (1)$$

where  $\theta$  is the temperature rise in the MoS<sub>2</sub> calculated with the one-dimensional thermal model,  $f_{pump}$  is the modulation frequency of the pump beams via the electro-optic modulator,  $f$  is the Ti:Sapphire repetition rate (80 MHz),  $\tau$  is the pump-probe delay time, and  $A$  is a constant. We fit Eq. (1) to our data by scaling  $A$  to the data at ~50 ps of pump probe delay time, and then iterating the thermal boundary conductance between the MoS<sub>2</sub> and water to achieve agreement between the model and data over ~1.5 ns of pump-probe delay time. For our thermal model, we assume literature values for the heat capacity and thermal conductivity of the water;<sup>[5]</sup> we are completely insensitive to the thermal conductivity of the MoS<sub>2</sub> sheets since they are so thin that the temperature is instantaneous homogeneous. We take the heat capacity of MoS<sub>2</sub> as 1.81 MJ m<sup>-3</sup> K<sup>-1</sup>. (ref: McLaren, R. C., “thermal conductivity anisotropy of molybdenum disulfide thin films”, Masters Thesis, University of Illinois at Urbana-Champaign, 2009)

**Enzymatic Activity Assay:** All experiments were performed in independent triplicates or better. 20 μg/ml of α-chymotrypsin (ChT) was incubated with varying concentrations of ceMoS<sub>2</sub> in 5 mM sodium phosphate buffer (pH 7.4) for 30 min, at a total volume of 184 μl/well. SPNA substrate (16 μl) was then added to reach a final SPNA concentration of 2 mM. The total volume is 200 μl/well. Enzymatic activity

was monitored every by measuring p-nitroaniline formation ( $\lambda = 405 \text{ nm}$ ) using a microplate reader (Synergy Mx, Bio-Tek Instruments, Winooski, VT). Control experiment showed that the auto-hydrolysis of SPNA was negligible. Activity rates are reported as change over 60 min time period.

**Enzymatic Loading comparison:** Because ChT is a well characterized enzyme, its inhibition by colloids has often been used to indicate protein loading capacities.<sup>[6]</sup> A comparison of ceMoS<sub>2</sub>'s loading capacity versus previous published results can thus be adapted. It can be seen that ceMoS<sub>2</sub> compares favorably to most nanomaterials, and is the only material to achieve comparable inhibition to Graphene Oxide. Figure is adapted from reference [6].

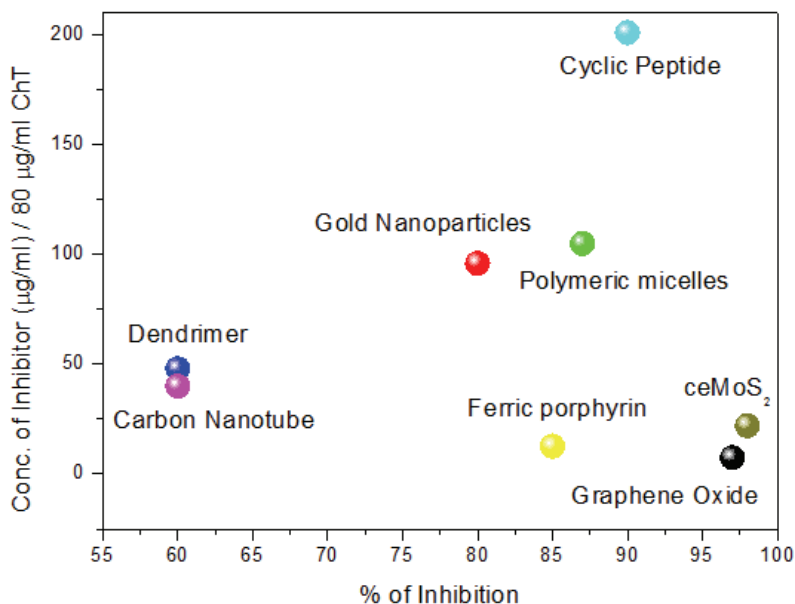

**ChT Activity restoration:** 40 µg/ml ChT was incubated with 11 ppm of ceMoS<sub>2</sub>. NaCl was added either before the addition of ceMoS<sub>2</sub> or after the 30 min incubation. An additional experiment extending the incubation time to 24 hr was also performed (see below). The NaCl concentration was varied from 0 to 1000 mM in 5 mM sodium phosphate buffer (pH 7.4), reaching a final concentration of 184 µL. SPNA stock solution was then added (16 µL) to reach a final SPNA concentration of 2 mM. All activity was normalized by measuring the absorbance of control experiment. The assays were performed in triplicates, and the averages are reported at 60 min time period.

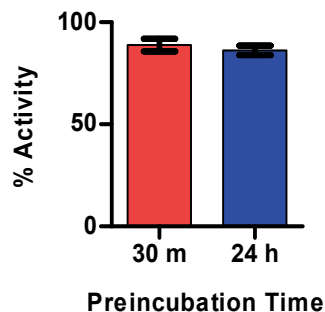

**Circular Dichroism (CD) Spectra:** Far-UV CD spectra of ChT (20  $\mu\text{g}/\text{ml}$ ) were measured on a JASCO Circular Dichroism Spectrophotometer J-815 with quartz cuvettes of 1 mm path length at 25  $^{\circ}\text{C}$ . The spectra were recorded from 190 to 250 nm. For the GO-ChT complex the concentration of GO is 11 ppm. The CD spectra of GO and buffer were subtracted from complex spectra to eliminate any background effects.

**Fluorescence Spectroscopy:** For the denaturation study, fluorescence spectra were measured on a ISS PC1 photon counting steady state spectrofluorimeter at room temperature (ca. 20  $^{\circ}\text{C}$ ). The samples were excited at 295 nm, and the emission spectra were recorded from 300 to 450 nm. Sample concentrations are the same as the CD study.

**Cell Viability Assay:** All products were purchased from Invitrogen/Gibco. Hela cells were grown in Minimum Essential Medium (MEM) + 10% Fetal Bovine Serum (FBS) with non-essential amino acid and sodium pyruvate supplements ("media"). After trypsinizing (TrypLE), cells were collected at 100,000/ml concentration in media, and then subjected to various treatments described in the main text. After treatments, cells were washed thrice using PBS and centrifugation (200 rcf, 2 minutes). Cells were then plated in 96 well plates at concentrations of 10,000/well. Media was added to reach a final volume of 200  $\mu\text{l}/\text{well}$ . Surplus samples were plated in 24 well plates for optical imaging (50,000/well, diluted to 1 ml). After 24 hr incubation, cell viabilities in the 96 well plates were measured using the CellTiter 96 Assay (CT96A). To each well, 20  $\mu\text{l}$  of CellTiter 96 Assay solution was added. Initial absorbance at  $\lambda = 495$  nm is measured, and cell viabilities were monitored by changes in absorbance at  $\lambda = 495$  nm. Viability data is normalized to control specimens. Experiments were performed in triplicates.

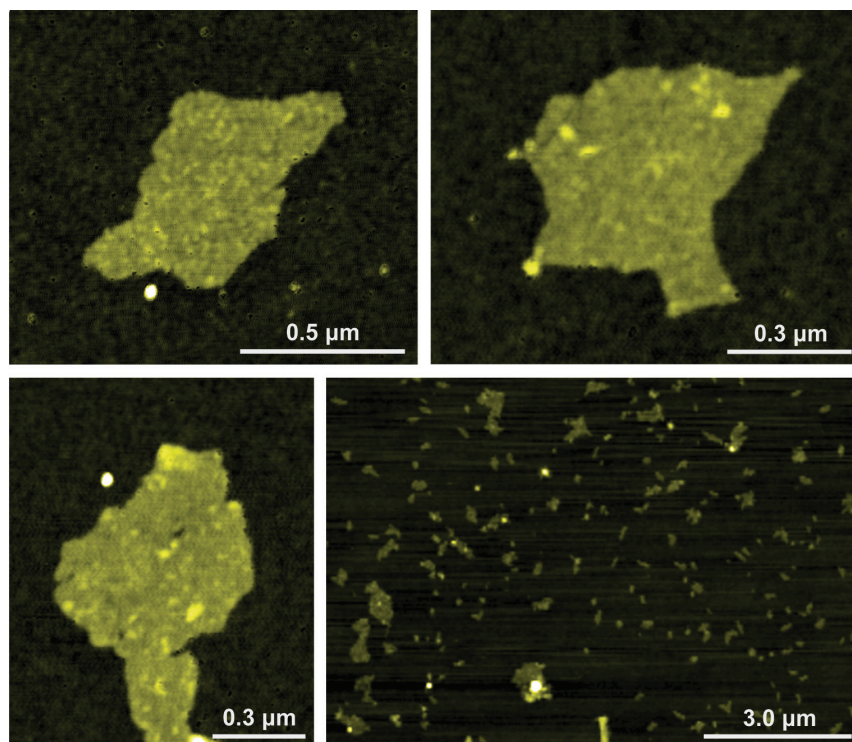

**Figure S1.** Representative AFM images and a large area AFM scan of individual ceMoS<sub>2</sub> monolayer sheets (bottom right).

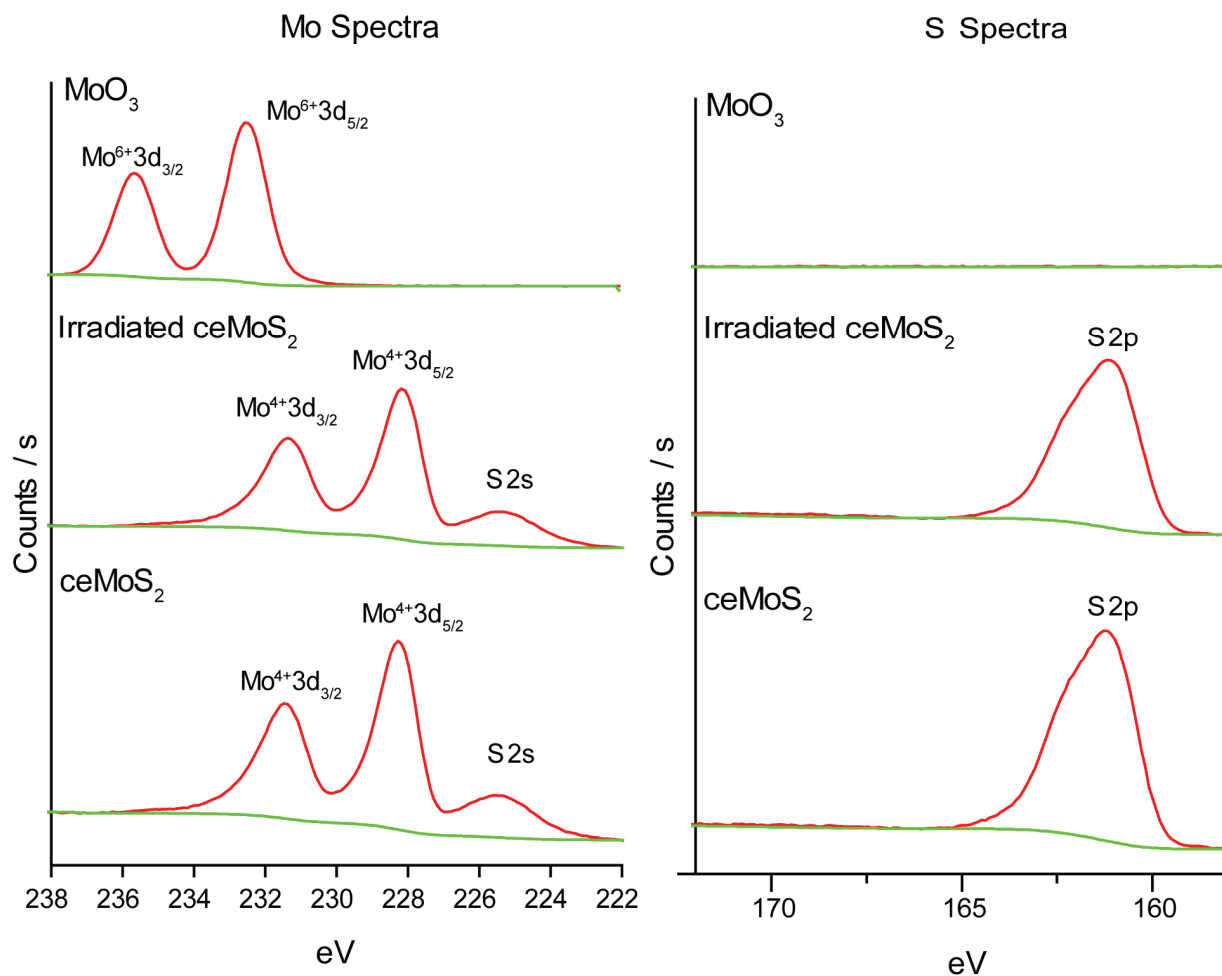

**Figure S2.** XPS spectra of  $\text{MoO}_3$ , irradiated  $\text{ceMoS}_2$  and  $\text{ceMoS}_2$ . The absence of  $\text{Mo}^{6+}$  peaks at  $\sim 232$  and  $236$  eV in  $\text{ceMoS}_2$ 's spectra indicate no significant oxidation before and after NIR irradiation ( $\lambda = 800$  nm, 15 m). Similarly, the lack of a prominent peak at 168-170 eV for S spectra indicates no significant oxidation for S before or after irradiation. The spectra of  $\text{MoO}_3$  is provided as a reference.

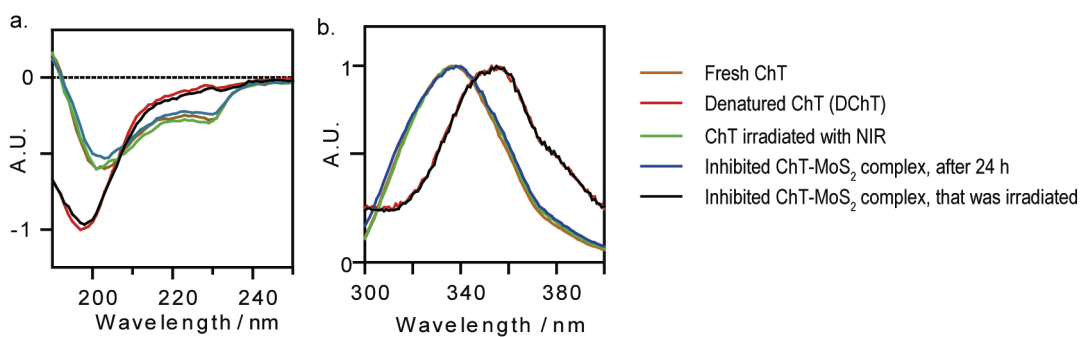

**Figure S3.** (a) CD and (b) fluorescent spectra of ChT after various treatments. Spectra of denatured ChT (DChT) obtained by heating solution to 50 °C via conventional oven is provided as a control reference. Free ChT irradiated with NIR ( $\lambda = 800$  nm) in absence of MoS<sub>2</sub> complexation is also provided as a reference.

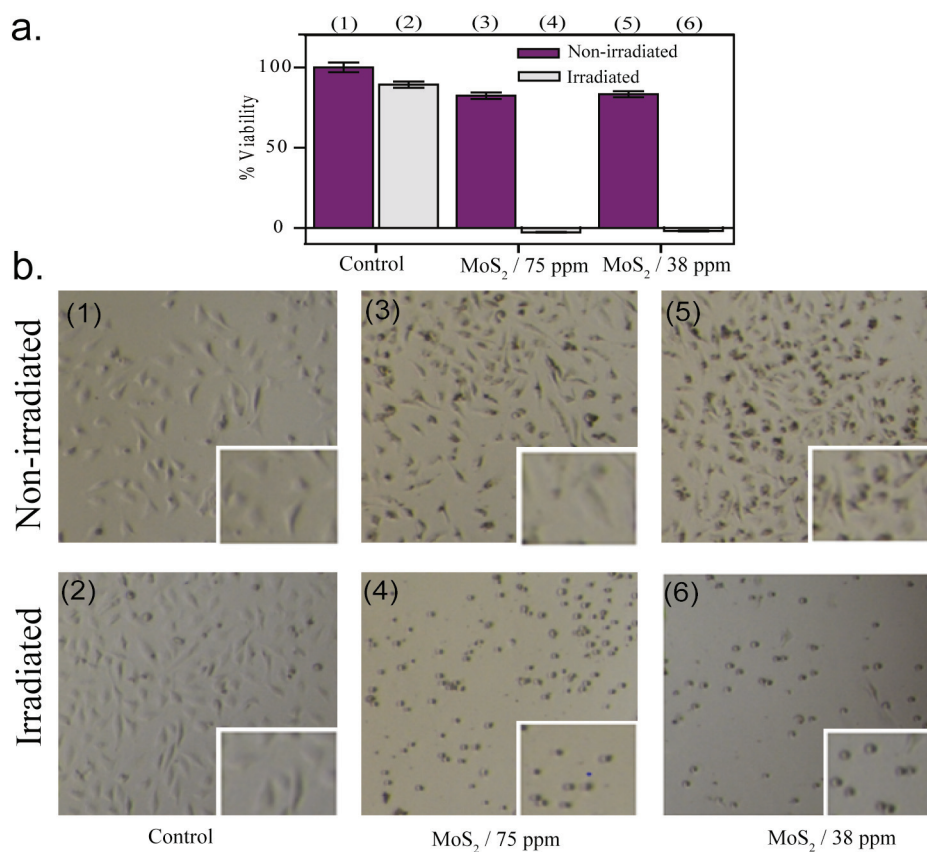

**Figure S4.** (a) Helix aspersa cell viabilities after various treatments. (b) Corresponding optical micrographs of cells after treatment.



## References

- [1] P. Joensen, R. F. Frindt, S. R. Morrison, *Mater. Res. Bull.* **1986**, *21*, 457-461.
- [2] P. E. Hopkins, J. R. Serrano, L. M. Phinney, S. P. Kearney, T. W. Grasser, C. T. Harris, *Journal of Heat Transfer* **2010**, *132*, 081302.
- [3] P. E. Hopkins, J. R. Serrano, L. M. Phinney, *International Journal of Thermophysics* **2010**, *31*, 2380-2393.
- [4] O. M. Wilson, X. Hu, D. G. Cahill, P. V. Braun, *Physical Review B* **2002**, *66*, 224301.
- [5] D. R. Lide, *CRC Handbook for Chemistry and Physics*, 89th ed., Internet Version, CRC Press/Taylor and Francis, Boca Raton, FL, **2008**.
- [6] M. De, S. S. Chou, V. P. Dravid, *J. Am. Chem. Soc.* **2011**, *133*, 17524-17527.
